# Supplementary material for: Mechanically rollable photodetectors enabled by centimetre-scale 2D MoS2 layer/TOCN composites
Source: Royal Society of Chemistry journal article supplement (doi:10.1039/d0na01053g), 2021-01-01
Supplement: d0na01053g2.pdf [file d0na01053g2.pdf]

## Electronic Supplementary Information (ESI)

### Mechanically rollable photodetectors enabled by centimetre-scale 2D MoS<sub>2</sub> layer/TOCN composites

Changhyeon Yoo,<sup>a</sup> Tae-Jun Ko,<sup>a</sup> Sang Sub Han,<sup>a,c</sup> Mashiyat Sumaiya Shawkat,<sup>a,d</sup> Kyu Hwan Oh,<sup>c</sup> Bo Kyoung Kim,<sup>e</sup> Hee-Suk Chung,<sup>e</sup> Yeonwoong Jung,<sup>\*a,b,d</sup>

---

<sup>a</sup> NanoScience Technology Center, University of Central Florida, Orlando, Florida 32826, USA

<sup>b</sup> Department of Materials Science and Engineering, University of Central Florida, Orlando, Florida 32816, USA

<sup>c</sup> Department of Materials Science and Engineering, Seoul National University, Seoul, 08826, South Korea

<sup>d</sup> Department of Electrical and Computer Engineering, University of Central Florida, Orlando, Florida 32816, USA

<sup>e</sup> Analytical Research Division, Korea Basic Science Institute, Jeonju 54907, South Korea

\* Corresponding author; [yeonwoong.jung@ucf.edu](mailto:yeonwoong.jung@ucf.edu)

---

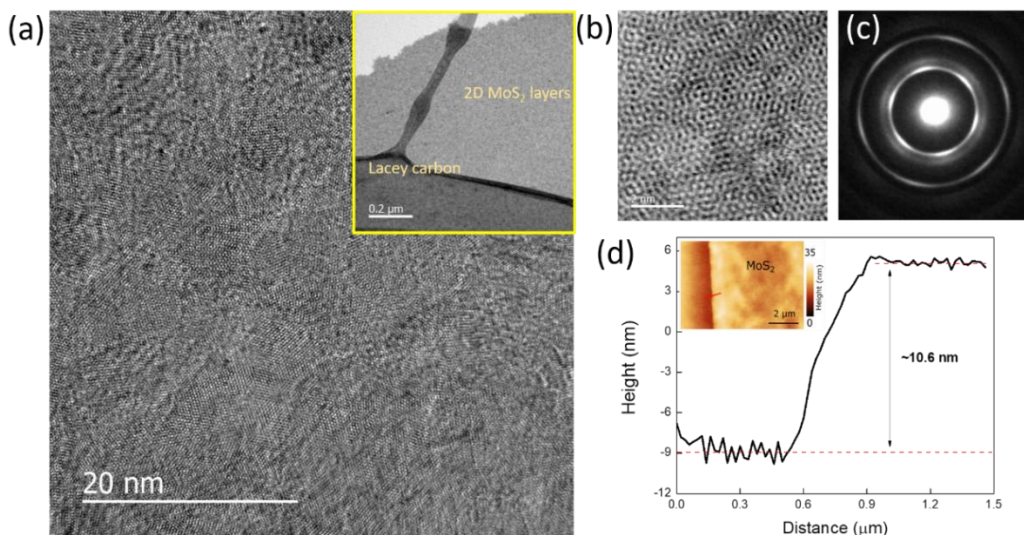

**Fig. S1** (a) Low-magnification transmission TEM image of CVD-2D MoS<sub>2</sub> layers. The inset image confirms the continuous morphology of the sample. (b) High-resolution TEM (HRTEM) image of the same sample showing Moiré fringes, indicative of vertically-stacked individual 2D layers. (c) Selective area electron diffraction (SAED) pattern obtained from the sample area corresponding to the inset image in (a). (d) AFM height profile obtained from CVD-2D MoS<sub>2</sub> layers grown with Mo of 3 nm thickness.

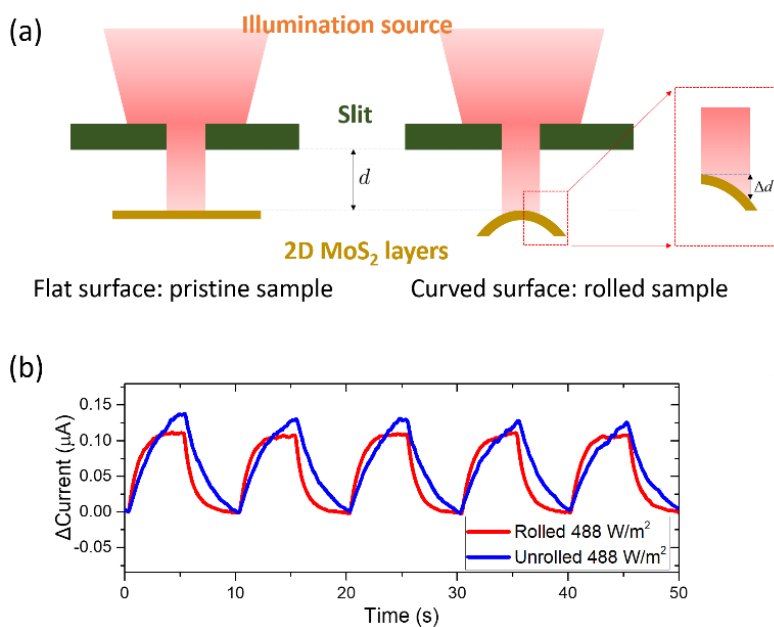

**Fig. S2** (a) Schematic illustrations of the experimental set-ups for photocurrent measurements in unrolled vs. rolled states. An identical sample is illuminated through a slit to ensure an identical illumination area. The rolled sample must exhibit a large variation of the illumination distance,  $\Delta d$ , which becomes larger with increasing the bending curvature. (b) Photo-responsive characteristics from a sample in two distinct states of rolled vs. unrolled, corresponding to the measurement schematics in (a).

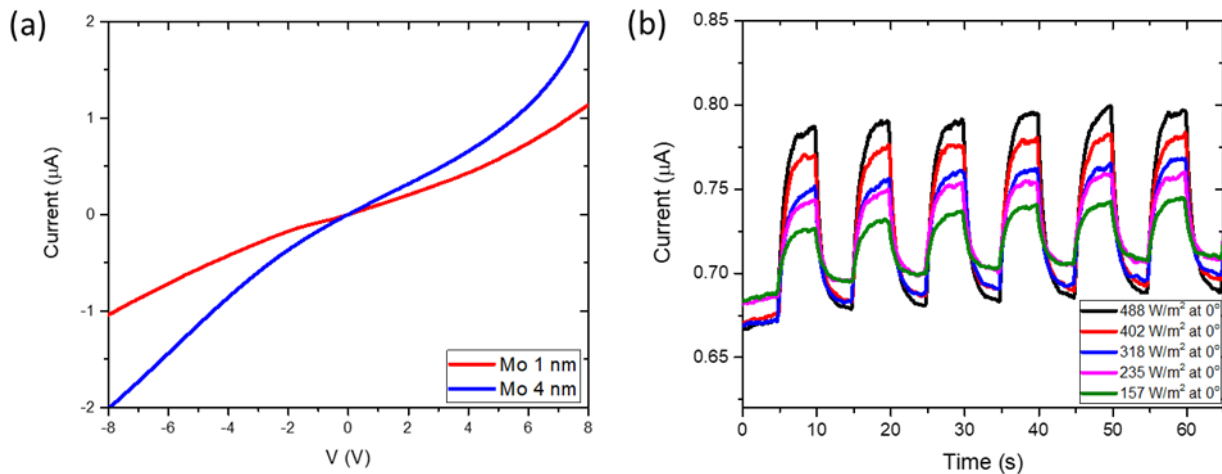

**Fig. S3** (a) Two-terminal I-V characteristics of two different  $\text{MoS}_2/\text{TOCN}$  samples prepared with Mo seed of 1 and 4 nm thickness. (b) Time-dependent current variation from a rolled  $\text{MoS}_2/\text{TOCN}$  sample prepared with Mo of 4 nm thickness under a periodic LED illumination.

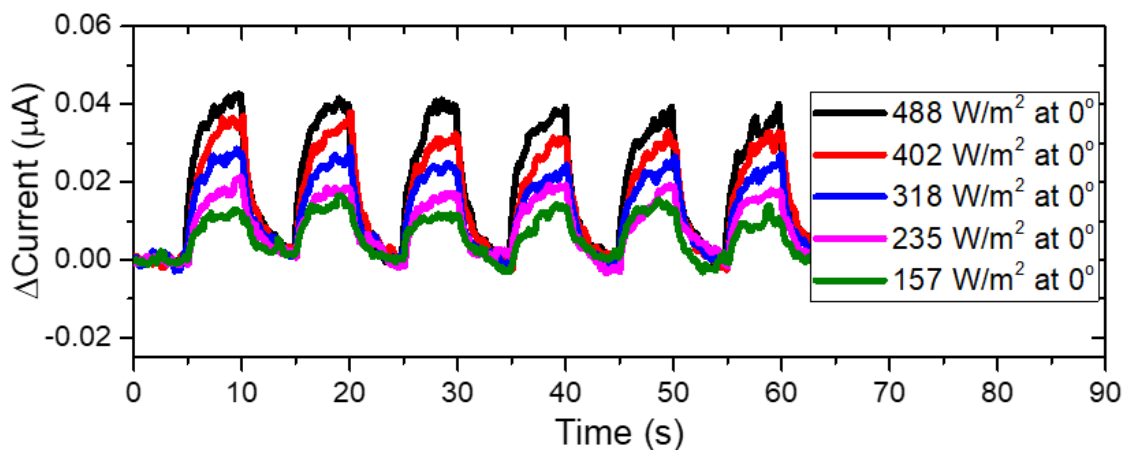

**Fig. S4** Time-dependent photocurrents from another sample under a periodic illumination with varying illumination intensities for Mo 1 nm sample which shows linear increase respect to the optical power.

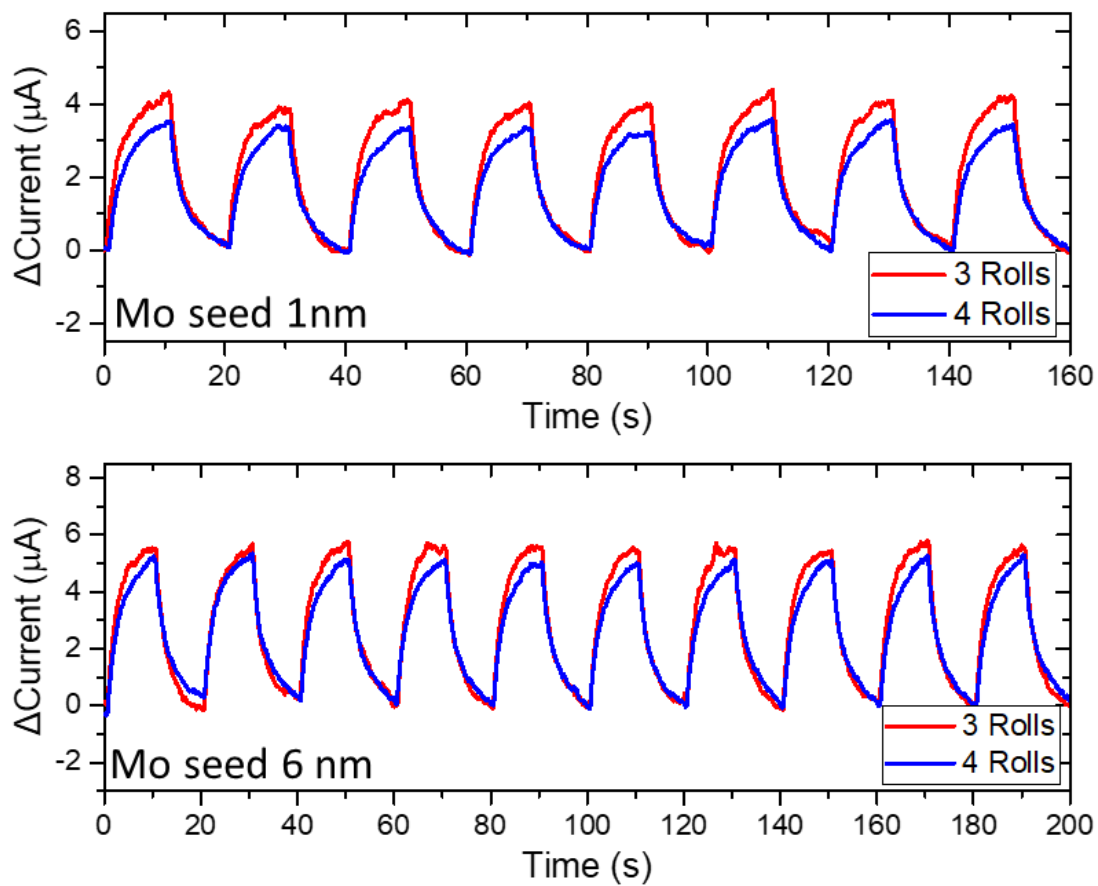

**Fig. S5** Time- and rolling number-dependent photocurrents obtained from MoS<sub>2</sub>/TOCN samples prepared with Mo of 1 and 6 nm thickness under a periodic LED illumination measured at 5 V.

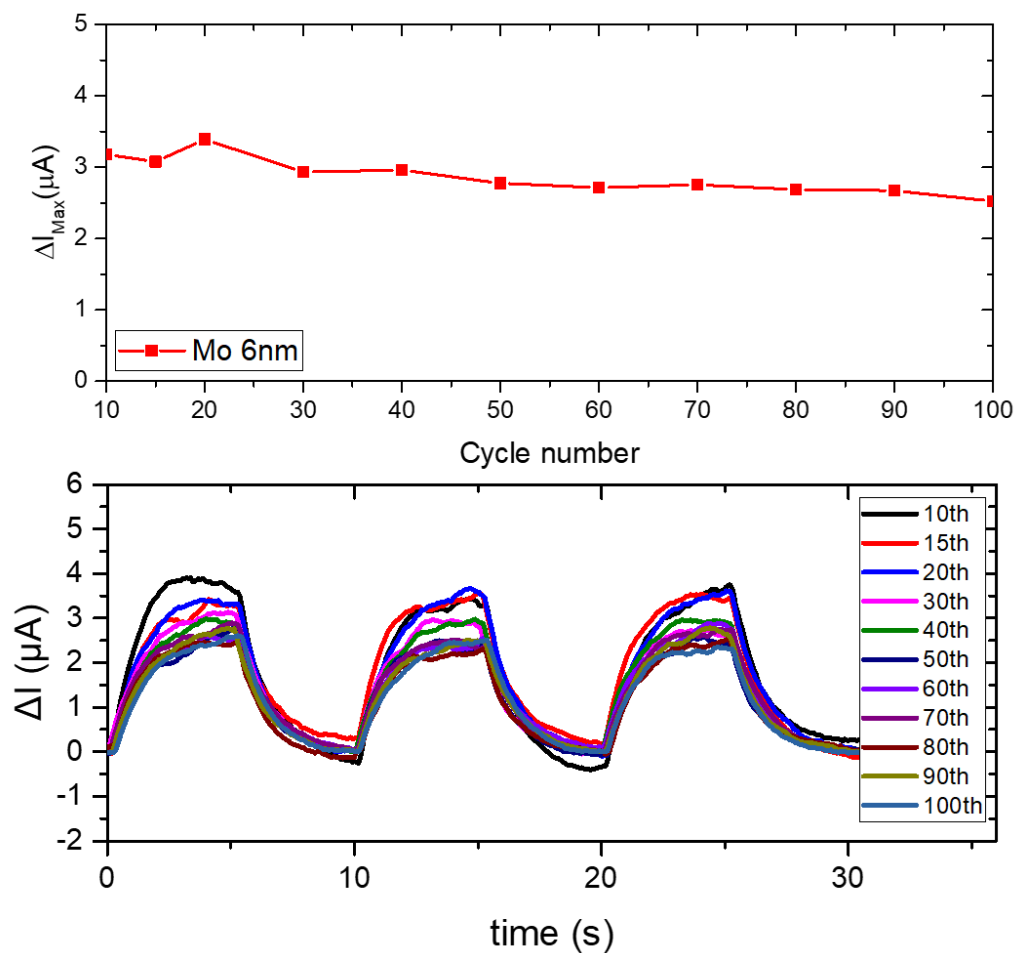

**Fig. S6** (a) Average  $\Delta I_{Max}$  ( $I_{Photo,Max} - I_0$ ) obtained from Mo 6 nm sample as shown in Fig. 5, during the cyclic unrolling/rolling of 100 times at 5 V. (b) Time-dependent photocurrents corresponding to (a) during 5 s on/off when 625 nm LED illumination intensity was 488 W/m<sup>2</sup>.

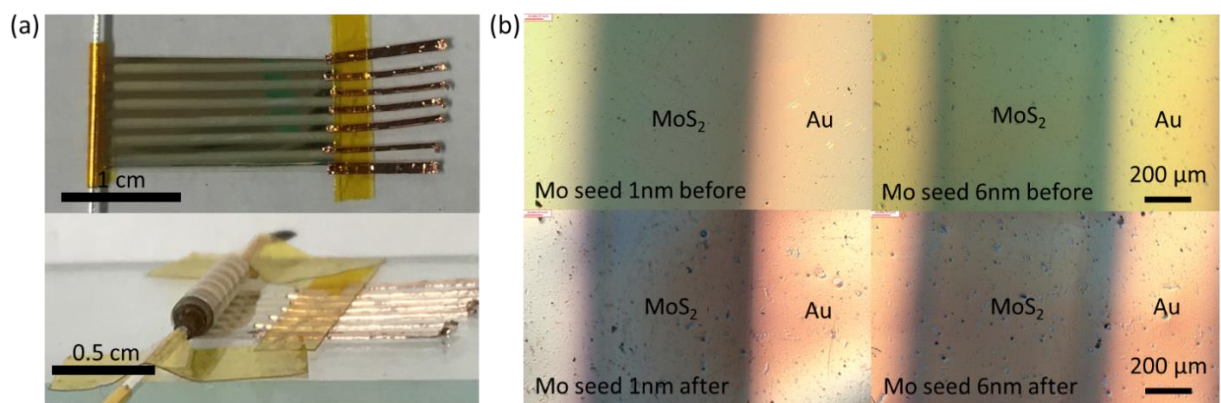

**Fig. S7** (a) MoS<sub>2</sub>/TOCN before (top) and after (bottom) a tight rolling. (b) Optical microscope images before (top) and after (bottom) the rolling.
